# Supplementary material for: Metastable asymmetrical structure of a shaftless V1 motor
Source: PubMed Central journal article supplement — Sci Adv. 2019 Jan 30;5(1):eaau8149. doi: 10.1126/sciadv.aau8149 (PMC6353620; doi:10.1126/sciadv.aau8149), 2019-01-30
Supplement: aau8149_SM.pdf [file aau8149_SM.pdf]

## Supplementary Materials for

### Metastable asymmetrical structure of a shaftless $V_1$ motor

Shintaro Maruyama, Kano Suzuki, Motonori Imamura, Hikaru Sasaki, Hideyuki Matsunami, Kenji Mizutani, Yasuko Saito, Fabiana L. Imai, Yoshiko Ishizuka-Katsura, Tomomi Kimura-Someya, Mikako Shirouzu, Takayuki Uchihashi, Toshio Ando, Ichiro Yamato, Takeshi Murata\*

\*Corresponding author. Email: t.murata@faculty.chiba-u.jp

Published 30 January 2019, *Sci. Adv.* **5**, eaau8149 (2019)

DOI: 10.1126/sciadv.aau8149

#### The PDF file includes:

Fig. S1. Purification and ATPase activity of wild-type  $A_3B_3$ , mutant  $A_3B_{(L65Y)3}$ , and DF complexes.

Fig. S2. Electron micrographs of negatively stained wild-type and mutant  $A_3B_3$  complexes.

Fig. S3. Comparison of the crown structures of wild-type and mutant  $A_3B_3$  complexes.

Fig. S4. Magnified views of the nucleotide binding sites of the bindable forms in  $eA_3B_{(L65Y)3}$ .

Fig. S5. Comparison of the nucleotide binding sites of wild-type and mutant complexes.

Table S1. Data collection and refinement statistics.

Table S2. RMSD values in superimpositions for each  $A_1B_1$  unit of  $eA_3B_{(L65Y)3}$  in the crystal structures of  $A_3B_3$  and  $V_1$  complexes.

Table S3. Contact surface areas between A and B subunits in various  $A_1B_1$  forms ( $\text{\AA}^2$ ).

Table S4. Sum of contact surface areas at the central domain in  $A_3B_3$  ( $\text{\AA}^2$ ).

Table S5. RMSD values in superimpositions for each  $A_1B_1$  unit of  $bA_3B_{(L65Y)3}$  in the crystal structures of  $A_3B_3$  and  $V_1$  complexes.

Legends for movies S1 to S4

#### Other Supplementary Material for this manuscript includes the following:

(available at [advances.sciencemag.org/cgi/content/full/5/1/eaau8149/DC1](https://advances.sciencemag.org/cgi/content/full/5/1/eaau8149/DC1))

Movie S1 (.mov format). AFM scan movie of the C-terminal side of the wild-type and mutant  $A_3B_3$ .

Movie S2 (.mov format). Conformational changes at the  $\beta$ -barrel domain induced by the mutation.

Movie S3 (.mov format). Conformational changes at the C-terminal domain of  $eA_3B_3$  induced by the mutation.

Movie S4 (.mov format). Conformational changes of  $eA_3B_{(L65Y)3}$  induced by binding AMP-PNP molecules.

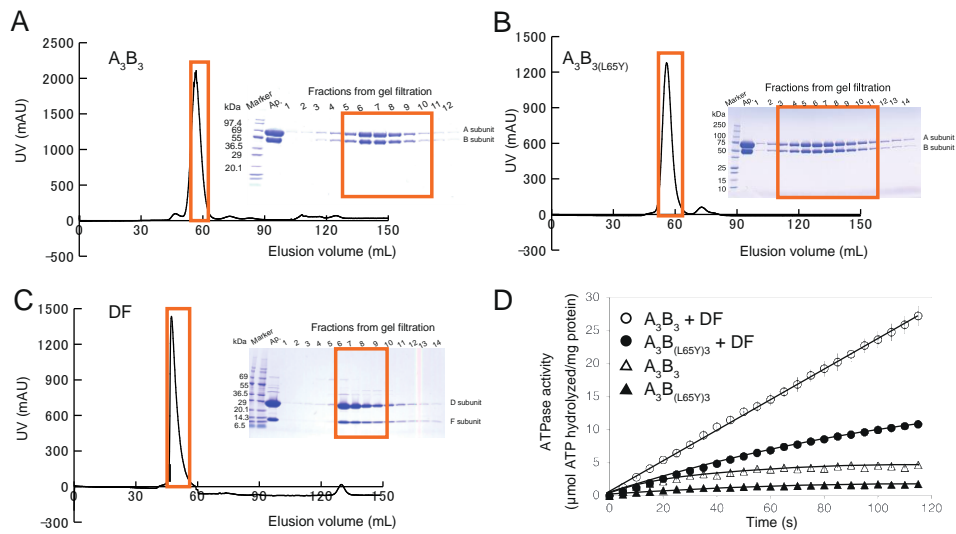

**Fig. S1. Purification and ATPase activity of wild-type  $A_3B_3$ , mutant  $A_3B_{(L65Y)3}$ , and DF complexes.** (A-C) Gel filtration profiles of  $A_3B_3$  (A),  $A_3B_{(L65Y)3}$  (B), and DF (C) complexes applied on HiLoad 16/60 Superdex 200 pg (A, B) or HiLoad 16/60 Superdex 75 pg (C) columns. SDS-PAGE patterns of samples obtained during the purification procedure are shown on the right side. Fractions surrounded by square boxes in the gel filtration profiles correspond to those in SDS-PAGE and were pooled as purified samples. (D) ATPase activities of the purified samples were measured using an ATP regeneration system. ATP hydrolysis rates at 23°C were determined by measuring the rate of NADH oxidation, which was defined by a decrease in absorbance at 340 nm. Wild-type  $A_3B_3$  had low activity, but the activity increased by reconstitution of  $V_1$  with DF complex. Mutant  $A_3B_{(L65Y)3}$  had very low activity, which also increased in the presence of DF. Standard deviations are shown with straight bars.

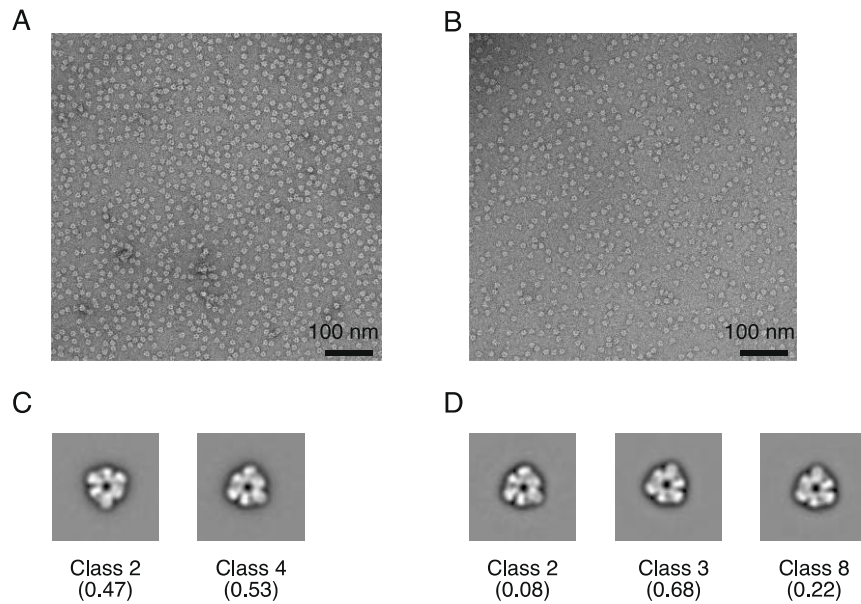

**Fig. S2. Electron micrographs of negatively stained wild-type and mutant  $A_3B_3$  complexes.**

Representative images of the wild-type (A) and mutant (B)  $A_3B_3$  complexes are shown. The scale bar corresponds to 100 nm. After manual particle selection for reference, 5097 particles were selected from 12 images of the wild-type molecules, while 15933 particles from 60 images of the mutant molecules. The calculated reference-free two-dimensional class averaged images from the wild-type (C) and mutant (D)  $A_3B_3$  complexes converged into two and three classes, respectively. Two-dimensional class averaging of the images revealed two classes with 0.47, 0.53 for wild-type  $A_3B_3$  and three classes with 0.08, 0.68, and 0.22 for the mutant  $A_3B_3$ . The fractions of each class are shown in parentheses.

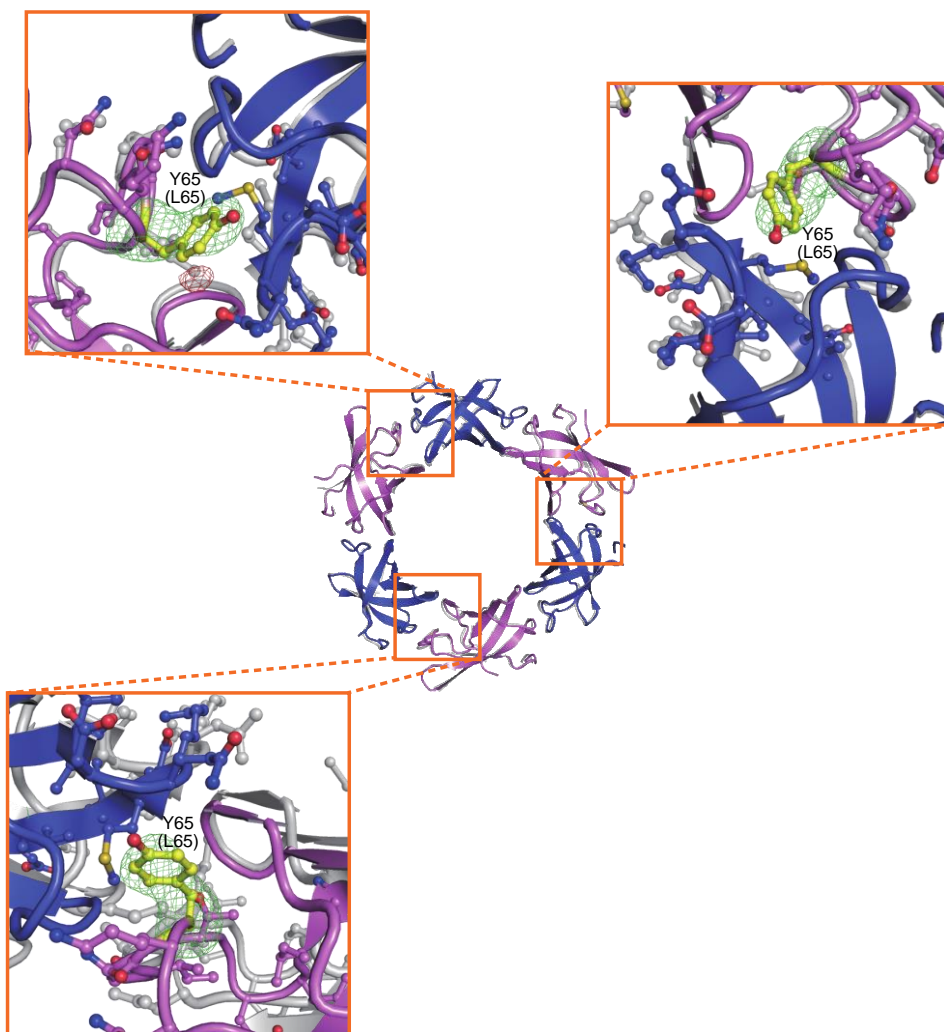

**Fig. S3. Comparison of the crown structures of wild-type and mutant  $A_3B_3$  complexes.** The  $\beta$ -barrel domain (crown) of mutant  $A_3B_{(L65Y)3}$  was superimposed at the 'bindable' form onto that of wild-type.  $A_3B_3$  mutant is shown as a blue or purple drawing as in Fig. 1 and wild-type is shown in grey. Orange squares in the central figure indicate the mutated sites. (Surrounding figures) Magnified pictures of the mutated sites show the mutated amino acid residue (L65Y) in yellow. The  $|F_o|-|F_c|$  omit map of L65Y residue at 4.0 sigma is shown by red (negative) and green (positive) meshes.

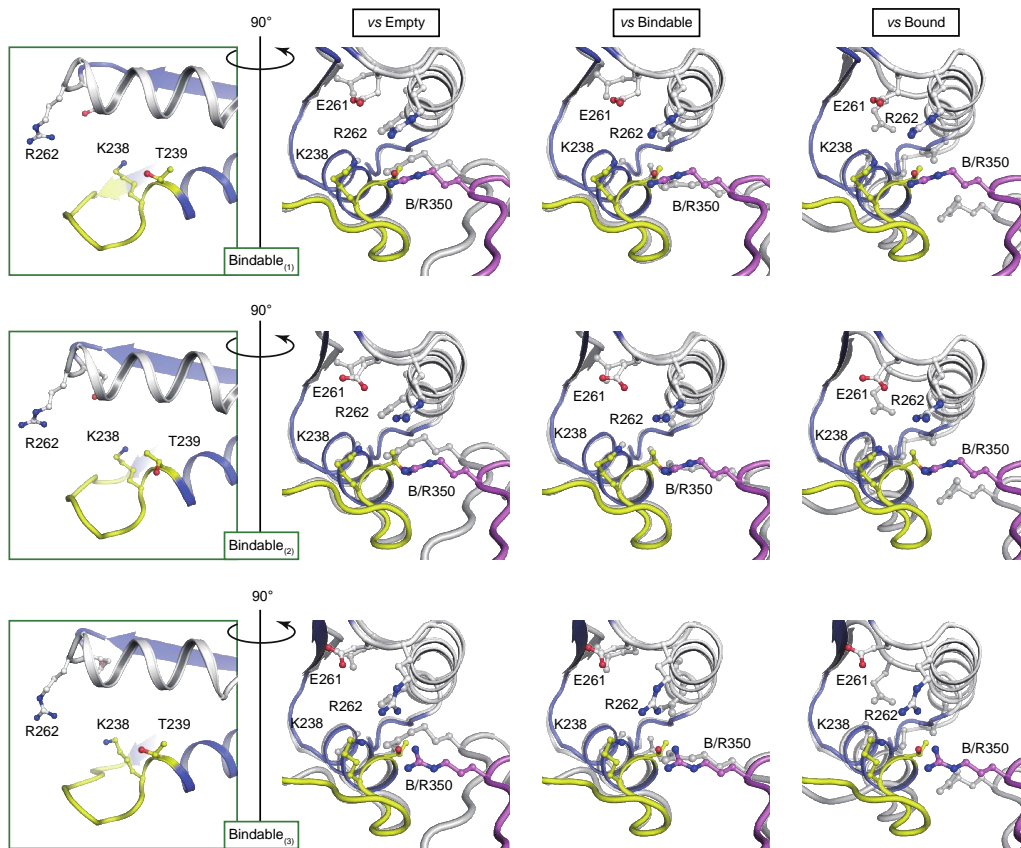

**Fig. S4. Magnified views of the nucleotide binding sites of the bindable forms in  $eA_3B_{(L65Y)3}$ .**

The nucleotide binding sites, corresponding to the green box in Fig. 3E, are shown with conserved residues. The P-loop and ‘arm’ are depicted by the yellow and white ribbon representations, respectively, similar to those in Fig. 4E-G. The three panels on the right display an A-B interface that was rotated  $90^\circ$  around a vertical axis from the figures on the far-left. ‘Bindable<sub>(1)-(3)</sub>’ forms in  $eA_3B_{(L65Y)3}$  (color) are superimposed at the A subunit (residues 67-593) with ‘empty’, ‘bindable’, and ‘bound’ in  $eA_3B_3$  (grey) with relevant amino acid residues.

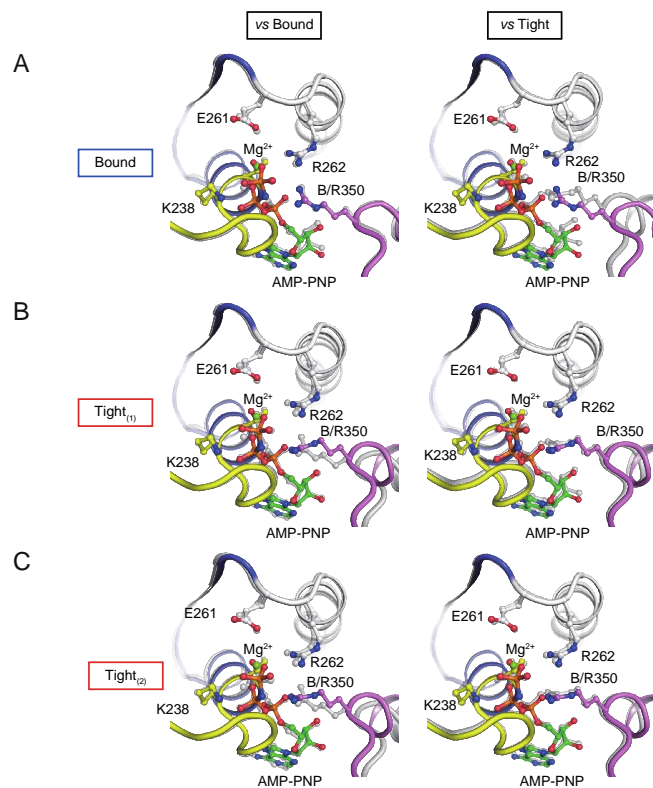

**Fig. S5. Comparison of the nucleotide binding sites of wild-type and mutant complexes.**

‘Bound’ (A), ‘tight<sub>(1)</sub>’ (B), and ‘tight<sub>(2)</sub>’ (C) forms in  $bA_3B_{(L65Y)}_3$  are shown similar to the right columns in Fig. 4E-G, and are superimposed at the A subunit (residues 67-593) with the ‘bound’ form in the  $bA_3B_{(L65Y)}_3$  (grey, left column) and ‘tight’ form in  $bV_1$  (grey, right column).

**Table S1. Data collection and refinement statistics.**

|                                                     | eA <sub>3</sub> B <sub>(L65Y)3</sub> | bA <sub>3</sub> B <sub>(L65Y)3</sub>                  |
|-----------------------------------------------------|--------------------------------------|-------------------------------------------------------|
| <b>Data collection</b>                              |                                      |                                                       |
| Space group                                         | <i>P</i> 2 <sub>1</sub>              | <i>P</i> 2 <sub>1</sub> 2 <sub>1</sub> 2 <sub>1</sub> |
| Cell dimensions                                     |                                      |                                                       |
| Unit cell a, b, c (Å)                               | 180.84, 107.77, 193.37               | 105.83, 151.37, 235.49                                |
| Unit cell α, β, γ (°)                               | 90, 99.39, 90                        | 90, 90, 90                                            |
| Resolution (Å)                                      | 50-3.38 (3.59-3.38)                  | 60-2.10 (2.23-2.10)                                   |
| <i>R</i> <sub>merge</sub>                           | 0.113 (0.674)                        | 0.124 (0.837)                                         |
| Mean <i>I</i> / σ( <i>I</i> )                       | 15.77 (2.90)                         | 11.32 (2.11)                                          |
| Completeness (%)                                    | 99.0 (94.2)                          | 99.5 (97.5)                                           |
| Redundancy                                          | 6.7 (6.4)                            | 6.6 (6.2)                                             |
| <b>Refinement</b>                                   |                                      |                                                       |
| Resolution (Å)                                      | 48.20-3.38                           | 54.87-2.10                                            |
| No. reflections                                     | 101796                               | 218240                                                |
| <i>R</i> <sub>work</sub> / <i>R</i> <sub>free</sub> | 0.2151/0.2575                        | 0.1659/0.1955                                         |
| No. atoms                                           |                                      |                                                       |
| Protein                                             | 47887                                | 24467                                                 |
| Ligand/ion                                          | 0                                    | 342                                                   |
| Water                                               | 100                                  | 1299                                                  |
| <i>B</i> -factors                                   |                                      |                                                       |
| Protein                                             | 108.80                               | 38.63                                                 |
| Ligand/ion                                          | -                                    | 54.25                                                 |
| Water                                               | 53.43                                | 40.55                                                 |
| R.m.s. deviations                                   |                                      |                                                       |
| Bond lengths (Å)                                    | 0.002                                | 0.006                                                 |
| Bond angles (°)                                     | 0.435                                | 0.774                                                 |
| Ramachandran favoured (%)                           | 98.0                                 | 98.7                                                  |
| Ramachandran allowed (%)                            | 1.9                                  | 1.3                                                   |
| Ramachandran outliers (%)                           | 0.0                                  | 0.0                                                   |
| PDB ID                                              | 5ZEA                                 | 5ZE9                                                  |

Numbers in parentheses are for the highest resolution shell.

*I* / σ(*I*), intensity divided by error of intensity; R, residual factor

**Table S2. RMSD values in superimpositions for each  $A_1B_1$  unit of  $eA_3B_{(L65Y)3}$  in the crystal structures of  $A_3B_3$  and  $V_1$  complexes.**

| Structure         | Form                    | $eA_3B_{(L65Y)3}$       |                         |                         |
|-------------------|-------------------------|-------------------------|-------------------------|-------------------------|
|                   |                         | Bindable <sub>(1)</sub> | Bindable <sub>(2)</sub> | Bindable <sub>(3)</sub> |
| $eA_3B_3$         | Empty                   | 1.30                    | 1.65                    | 2.29                    |
|                   | Bindable                | 1.02                    | 0.88                    | 1.21                    |
|                   | Bound                   | 3.58                    | 3.26                    | 2.87                    |
| $bA_3B_3$         | Empty                   | 1.33                    | 1.60                    | 2.16                    |
|                   | Bound <sub>(1)</sub>    | 3.84                    | 3.59                    | 3.35                    |
|                   | Bound <sub>(2)</sub>    | 4.01                    | 3.76                    | 3.52                    |
| $bV_1$            | Empty                   | 1.56                    | 1.83                    | 2.39                    |
|                   | Bound                   | 4.12                    | 3.85                    | 3.54                    |
|                   | Tight                   | 4.79                    | 4.61                    | 4.48                    |
| $eA_3B_{(L65Y)3}$ | Bindable <sub>(1)</sub> | 0                       | 0.75                    | 1.46                    |
|                   | Bindable <sub>(2)</sub> | 0.75                    | 0                       | 1.14                    |
|                   | Bindable <sub>(3)</sub> | 1.46                    | 1.14                    | 0                       |

The values were calculated using C $\alpha$  atoms.



**Table S3. Contact surface areas between A and B subunits in various A<sub>1</sub>B<sub>1</sub> forms (Å<sup>2</sup>).**

| Structure                            | A <sub>1</sub> B <sub>1</sub> form <sup>a</sup> | Contact surface (Å <sup>2</sup> ) |
|--------------------------------------|-------------------------------------------------|-----------------------------------|
| eA <sub>3</sub> B <sub>3</sub>       | Empty                                           | 2243.2                            |
|                                      | Bindable                                        | 1812.7                            |
|                                      | Bound                                           | 2293.7                            |
| bA <sub>3</sub> B <sub>3</sub>       | Empty                                           | 2379.9                            |
|                                      | Bound <sub>(1)</sub>                            | 2448.2                            |
|                                      | Bound <sub>(2)</sub>                            | 2560.6                            |
| bV <sub>1</sub>                      | Empty                                           | 2291.0                            |
|                                      | Bound                                           | 2488.0                            |
|                                      | Tight                                           | 3130.7                            |
| eA <sub>3</sub> B <sub>(L65Y)3</sub> | Bindable <sub>(1)</sub>                         | 1998.6                            |
|                                      | Bindable <sub>(2)</sub>                         | 1959.1                            |
|                                      | Bindable <sub>(3)</sub>                         | 1982.4                            |
| bA <sub>3</sub> B <sub>(L65Y)3</sub> | Tight <sub>(1)</sub>                            | 3026.5                            |
|                                      | Bound                                           | 2265.0                            |
|                                      | Tight <sub>(2)</sub>                            | 2923.4                            |

<sup>a</sup>Respective forms correspond to those observed in various complexes shown in Fig. 1D-F (eA<sub>3</sub>B<sub>3</sub>, bA<sub>3</sub>B<sub>3</sub>, and bV<sub>1</sub>), Fig. 3C (eA<sub>3</sub>B<sub>(L65Y)3</sub>), and Fig. 4D (bA<sub>3</sub>B<sub>(L65Y)3</sub>).

**Table S4. Sum of contact surface areas at the central domain in A<sub>3</sub>B<sub>3</sub> (Å<sup>2</sup>).**

| Structure                            | Contact surface (Å <sup>2</sup> ) <sup>a</sup> |                                          |
|--------------------------------------|------------------------------------------------|------------------------------------------|
|                                      | Intra-A <sub>1</sub> B <sub>1</sub> unit       | Inter-A <sub>1</sub> B <sub>1</sub> unit |
| eA <sub>3</sub> B <sub>3</sub>       | 4837.0                                         | 2662.4                                   |
| bA <sub>3</sub> B <sub>3</sub>       | 5561.0                                         | 2809.0                                   |
| eA <sub>3</sub> B <sub>(L65Y)3</sub> | 4547.3                                         | 2772.1                                   |
| bA <sub>3</sub> B <sub>(L65Y)3</sub> | 5717.0                                         | 2596.1                                   |

<sup>a</sup>Sum of all contact surface areas at the central domain between A and B subunits of A<sub>3</sub>B<sub>3</sub>

**Table S5. RMSD values in superimpositions for each  $A_1B_1$  unit of  $bA_3B_{(L65Y)3}$  in the crystal structures of  $A_3B_3$  and  $V_1$  complexes.**

| Structure         | Form                    | $bA_3B_{(L65Y)3}$    |       |                      |
|-------------------|-------------------------|----------------------|-------|----------------------|
|                   |                         | Tight <sub>(1)</sub> | Bound | Tight <sub>(2)</sub> |
| $eA_3B_3$         | Empty                   | 4.70                 | 4.17  | 4.76                 |
|                   | Bindable                | 4.79                 | 3.98  | 4.84                 |
|                   | Bound                   | 2.35                 | 1.53  | 2.39                 |
| $bA_3B_3$         | Empty                   | 4.52                 | 3.98  | 4.55                 |
|                   | Bound <sub>(1)</sub>    | 1.75                 | 0.94  | 1.81                 |
|                   | Bound <sub>(2)</sub>    | 1.63                 | 0.92  | 1.69                 |
| $bV_1$            | Empty                   | 4.54                 | 4.01  | 4.59                 |
|                   | Bound                   | 1.69                 | 1.00  | 1.74                 |
|                   | Tight                   | 0.91                 | 1.63  | 0.59                 |
| $eA_3B_{(L65Y)3}$ | Bindable <sub>(1)</sub> | 4.75                 | 3.99  | 4.80                 |
|                   | Bindable <sub>(2)</sub> | 4.54                 | 3.76  | 4.60                 |
|                   | Bindable <sub>(3)</sub> | 4.39                 | 3.52  | 4.44                 |
| $bA_3B_{(L65Y)3}$ | Tight <sub>(1)</sub>    | 0.00                 | 1.54  | 0.79                 |
|                   | Bound                   | 1.54                 | 0.00  | 1.55                 |
|                   | Tight <sub>(2)</sub>    | 0.79                 | 1.55  | 0.00                 |

The values were calculated using C $\alpha$  atoms.

## Descriptions of movies S1 to S4

**Movie S1. AFM scan movie of the C-terminal side of the wild-type and mutant  $A_3B_3$ .** AFM scan movie of the C-terminal side of the wild-type  $A_3B_3$  (upper panel) and mutant  $A_3B_{(L65Y)3}$  (lower panel) without nucleotide. Scan area:  $30 \times 20 \text{ nm}^2$ ; frame rate: 5 fps.

### **Movie S2. Conformational changes at the $\beta$ -barrel domain induced by the mutation.**

Conformational changes at the  $\beta$ -barrel domain (or crown) of the nucleotide-free  $A_3B_3$  complex induced by the B(L65Y) mutation. The colors and view are consistent with those of fig. S3. Upper panel, side view; lower panel, top view. The video was generated by morphing the X-ray crystal structures of nucleotide-free wild-type ( $eA_3B_3$ ) and mutant ( $eA_3B_{(L65Y)3}$ )  $A_3B_3$  using Chimera and PyMOL.

**Movie S3. Conformational changes at the C-terminal domain of  $eA_3B_3$  induced by the mutation.** Conformational changes at the C-terminal domain of the nucleotide-free  $A_3B_3$  complex induced by the B(L65Y) mutation. The colors and view are consistent with those of Fig. 3C. The video was generated by morphing the X-ray crystal structures of nucleotide-free wild-type ( $eA_3B_3$ ) and mutant ( $eA_3B_{(L65Y)3}$ )  $A_3B_3$  using Chimera and PyMOL.

### **Movie S4. Conformational changes of $eA_3B_{(L65Y)3}$ induced by binding AMP-PNP molecules.**

Conformational changes of the nucleotide-free mutant  $A_3B_{(L65Y)3}$  complex induced by binding three AMP-PNP molecules. The colors and view are consistent with those of Fig. 4A. The video was generated by morphing the X-ray crystal structures of nucleotide-free ( $eA_3B_{(L65Y)3}$ ) and AMP-PNP bound mutant ( $bA_3B_{(L65Y)3}$ )  $A_3B_3$  using Chimera and PyMOL.
